# Supplementary material
Source: Springer Nature journal article supplement (https://www.springermedizin.de/resource/supplementary/13229_2011_29_MOESM1_ESM.pdf/9676004)

A

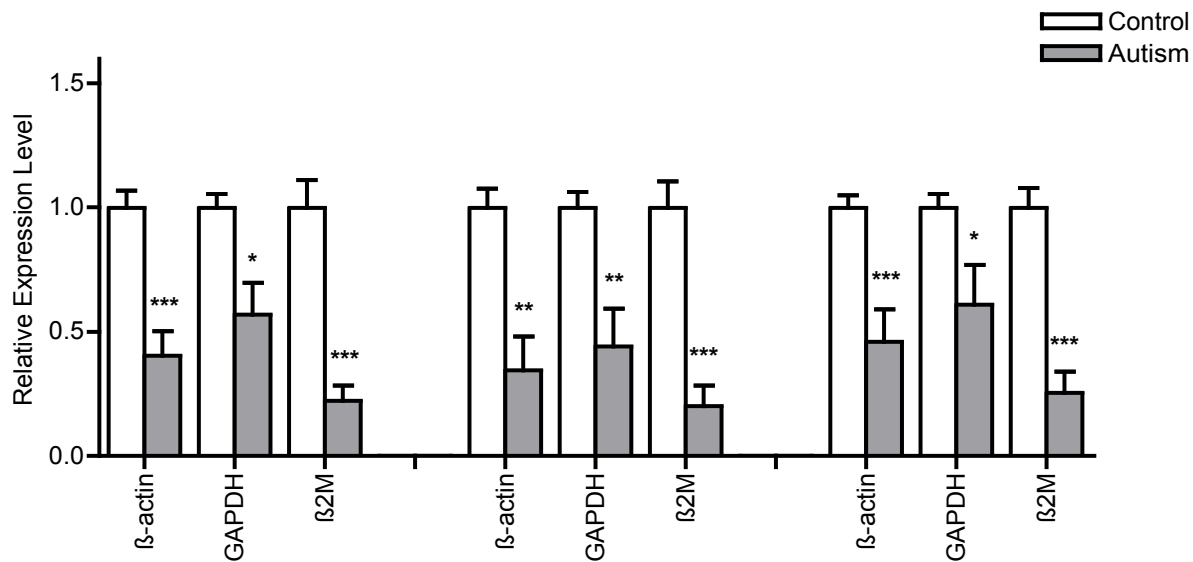

B

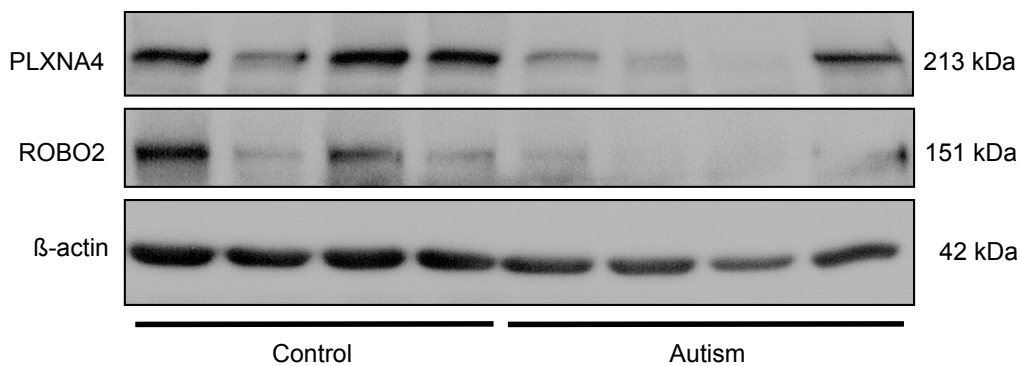

C

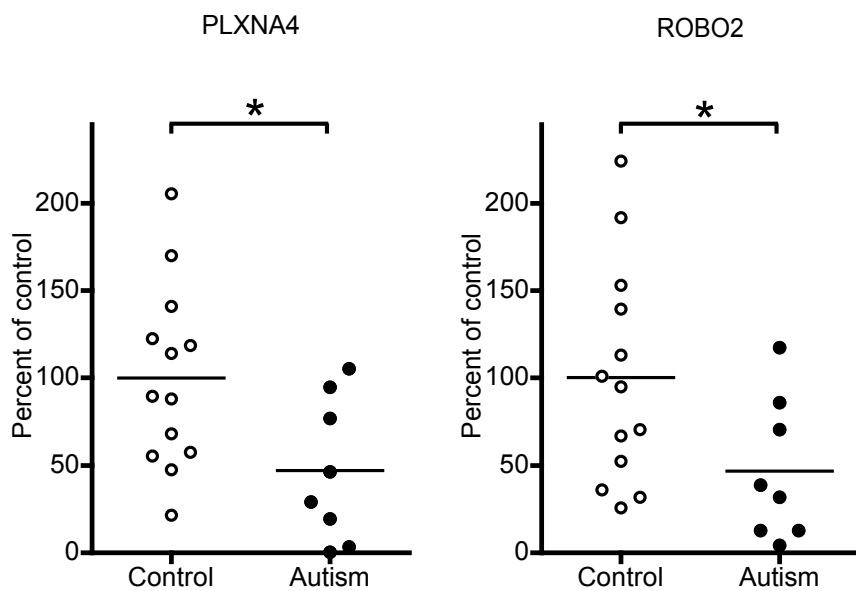

Supplement: MOESM1 [file 9676004]
